# Supplementary material for: Remarkable thermodynamic stability toward hydrolysis of tripodal titanium alkoxidesElectronic supplementary information (ESI) available: syntheses and spectroscopic characterization of new compounds. See http://www.rsc.org/suppdata/cc/b3/b315092e/
Source: Royal Society of Chemistry journal article supplement (doi:10.1039/b315092e), 2004-01-01
Supplement: b315092e.doc [file b315092e.doc]

**Electronic Supporting Information for**

**“Remarkable thermodynamic stability toward hydrolysis of tripodal titanium alkoxides”**

**Vesela Ugrinova, Gregory A. Ellis and Seth N. Brown***

**General Procedures.** Unless otherwise noted, all procedures were carried out on the benchtop. When necessary, CH2Cl2 was dried over molecular sieves, followed by CaH2. All other solvents were used as received. 1H and 13C{1H} NMR spectra (referenced to tetramethylsilane) and 19F NMR spectra (referenced to CFCl3) were obtained on a Varian VXR-300 spectrometer. IR spectra were measured on a Perkin-Elmer PARAGON 1000 FT-IR spectrometer. Fast atom bombardment mass spectra were obtained on a JEOL LMS-AX505HA mass spectrometer using 3-nitrobenzyl alcohol as a matrix. Peaks reported are the mass number of the most intense peak of isotope envelopes; in all cases, isotope patterns were in agreement with values calculated from the molecular formulas. For EI mass spectral analysis a JEOL GCmate spectrometer using EI ionization mode was employed. Elemental analyses were performed by M-H-W Laboratories (Phoenix, AZ).

All of the LTi complexes have the following IR peaks, within 3 cm-1: 2954 (s), 2904 (m), 2868 (m), 1474 (m), 1444 (m), 1412 (w), 1361 (m), 1306 (w), 1260 (s), 1240 (m), 1204 (w), 1171 (w), 1128 (w), 915 (w), 873 (w), 852 (m), 811 (w), 758 (m). Only unique peaks are reported for the individual compounds.

**Tris(3,5–di-*tert -*butyl**-**4-hydroxybenzyl)amine, N(CH2C6H2*t*Bu2OH)3 (LH3).** This preparation was adapted from the work of Kol and coworkers.[[1]](#footnote-2) Into a 250-mL round-bottom flask were weighed 4.000 g hexamethylenetetramine (Aldrich, 0.0285 mol), 70.646 g 2,4-di-*tert*-butylphenol (Aldrich 0.342 mol, 12 eq) and 13.90 mL 37% aqueous formaldehyde solution (Fisher, 0.171 mol, 6 eq). A stirbar was added and a condenser attached to the flask. The reaction mixture was refluxed for 48 h turning to a clear yellow solution at the beginning and a light yellow paste at the end of the stirring. The paste was allowed to cool and then was transferred into a 1000-mL beaker where it was dissolved in a minimum amount of CHCl3 (~400 mL). A stirbar was added and the solution volume doubled by addition of 1 M HCl, which led to the formation of a white precipitate. The yellow liquid on the top of the mixture was decanted and the fluffy white precipitate was filtered on a glass frit and was washed with 2  100 mL CHCl3. The obtained white solid was transferred into a 1000 mL beaker where 400 mL CH2Cl2 and 500 mL saturated NaHCO3 solution were added. The mixture was stirred until all of the solid had dissolved. The organic layer was collected, dried over MgSO4, and the solvent was evaporated on a rotary evaporator. The obtained solid was air-dried. Yield: 18.793 g (25%).

**LTi(O*t*Bu).** In a glovebox under an atmosphere of nitrogen into a 100 mL round-bottom flask were weighed 0.3333 g of titanium tetra(*tert*-butoxide) (Strem, 0.979 mmol) and 0.5646 g of LH3(0.952 mmol, 1 eq). A stirbar was added and a Teflon needle valve was attached to the flask, which was then taken out of the glove box and affixed to a vacuum line. Dry CH2Cl2 (30 mL) was added by vacuum transfer and the yellow solution stirred for 5 min at room temperature. The solution was stripped to dryness on the vacuum line and the yellow solid was isolated in the air. Yield: 0.6460 g (96%). 1H NMR (C6D6):  7.44 (d, 2 Hz, 3H, Ar*H*), 6.82 (d, 2.4 Hz, 3H, ArH), 4.08 (d, 13.5 Hz, 3H, C*H*H'), 2.65 (d, 13.5 Hz, 3H, CH*H'*), 1.88 (s, 9H, O*t*Bu), 1.66 (s, 27H, Ar*t*Bu), 1.34 (s, 27H, Ar*t*Bu). 13C{1H} NMR (C6D6):  161.53, 142.99, 135.94, 125.28, 124.83, 123.58, 59.60, 35.84, 34.88, 33.18, 32.29, 31.70, 30.50. IR: 1603 (w), 1391 (w), 1293 (w), 1023 (s), 796 (w). EI-MS: *m/z* 789 (M+). Anal. Calcd. for C49H75NO4Ti: C 74.50, H 9.57, N 1.77. Found: C 74.36, H 9.37, N 1.80.

**LTi(OCOCF3).** To a solution of 1.0278 g LTi(O*t*Bu) (0.00130 mol) in 20 mL C6H6 in a 100-mL flask were added 1.0 mL CF3COOH (Aldrich, 0.013 mol, 10 eq). The solution immediately changed from yellow to orange. After the volume of the solution was reduced on a rotary evaporator to about half of the initial volume, 30 mL CH3CN was added and orange needle crystals formed immediately. The mixture was stirred for 15 min to allow all of the LTi(OCOCF3)to precipitate, then was suction filtered on a fritted glass funnel, washed with 3  10 mL CH3CN and then air-dried to give 1.0222 g LTi(OCOCF3) (95%). 1H NMR (C6D6):  7.41 (d, 2 Hz, 3H, Ar*H*), 6.75 (d, 2 Hz, 3H, Ar*H*), 3.25 (sl br, 6H, NC*H*2Ar), 1.58 (s, 27H, *t*Bu), 1.31 (s, 27H, *t*Bu). 13C{1H} NMR (C6D6):  161.12, 159.07 (q, 2*J*CF = 39 Hz), 145.19, 135.95, 124.71, 124.24, 116.49 (q, 1*J*CF = 289 Hz), 59.51, 35.34, 34.94, 31.81, 29.83. 19F NMR (C6D6):  75.09. IR (evapd film, cm‑1): 1719 (s), 1400 (w), 1171 (s), 866 (m). EI/MS *m/z* 829 (M+). Anal. Calcd for C47H66F3NO5Ti: C, 68.02; H, 8.02; N, 1.69. Found: C, 67.89; H, 7.95; N, 1.70.

**LTi(OH).** An orange solution of 1.0222 g LTi(OCOCF3) (0.00123 mol) in 50 mL CH2Cl2 was placed in 125-mL separatory funnel and shaken with 50 mL 0.1 M aqueous NaOH for 10 min. The light yellow CH2Cl2 layer was separated and set aside. The water layer was washed with another portion of CH2Cl2 (50 mL), which was combined with the first extract, dried over MgSO4 and stripped to dryness on a rotary evaporator giving a light yellow solid, which was a mixture of LTi(OH) and LTi–O–TiL. The solid was dissolved with gentle heating in 20 mL of acetone, 40 mL water H2O was added, and the light yellow suspension was stirred for 20 min at room temperature. The light yellow precipitate of LTi(OH) was collected by suction filtration on a fritted glass funnel, washed with 3  10 mL of 50% aqueous acetone, and then air-dried to yield 0.8792 g LTi(OH) (98%). 1H NMR (C6D6):  7.44 (d, 2 Hz, 3H, Ar*H*), 6.81 (d, 2 Hz, 3H, Ar*H*), 4.03 (d, 13.5 Hz, 3H, C*H*H'), 2.59 (d, 13.5 Hz, 3H, CH*H'*), 1.63 (s, 27H, *t*Bu), 1.34 (s, 27H, *t*Bu). 13C{1H} NMR (C6D6):  161.41, 143.47, 136.26, 125.23, 124.87, 123.65, 59.57, 35.61, 34.89, 32.25, 30.31. IR: 3684 (m, sharp), 1626 (w), 1603 (w), 1391 (m), 1289 (m), 1027 (w), 983 (w). Anal. Calcd. for C45H67NO4Ti: C, 73.65; H, 9.20; N, 1.91. Found: C, 73.76; H, 9.28; N, 1.94.

**LTi(OCH3).** To a solution of 0.1274 g LTi(OH) (0.170 mmol) dissolved in 5 mL C6H6 in a 25-mL round-bottom flask was added 15 mL CH3OH. The yellow slurry was stirred for 20 h and then suction filtered on a fritted glass funnel, washed with 3  10 mL CH3OH, and air-dried to furnish 0.0958 g LTi(OCH3) (75%). 1H NMR (C6D6):  7.46 (d, 2 Hz, 3H, Ar*H*), 6.82 (d, 2 Hz, 3H, Ar*H*), 4.80 (s, 3H, OC*H*3), 4.01 (d, 13 Hz, 3H, C*H*H'), 2.59 (d, 13 Hz, 3H, CH*H*'), 1.67 (s, 27H, *t*Bu), 1.36 (s, 27H, *t*Bu). 13C{1H} NMR (C6D6):  161.46, 143.09, 136.14, 125.23, 124.87, 123.61, 65.69 (TiO*C*H3), 59.65, 35.70, 34.88, 32.30, 30.29. ES-MS: *m/z* 748 (M+H). IR: 2818 (w), 1602 (w), 1391 (w), 1290 (w), 981 (w). Anal. Calcd. for C46H69NO4Ti: C, 73.87; H, 9.30; N, 1.87. Found: C, 74.83; H, 9.13; N, 1.90.

**LTi–O–TiL.** A solution of 0.1598 g LTi(OCOCF3) (0.1926 mmol) in 20 mL CH2Cl2 was placed in a 125-mL separatory funnel and washed with 50 mL 0.1 M NaOH for 10 min. The light yellow CH2Cl2 layer was separated and set aside. The water layer was washed with another 20 mL of CH2Cl2, which was combined with the first extract, dried over MgSO4, and stripped to dryness on a rotary evaporator giving a light yellow solid, which was a mixture of LTi(OH) and LTiOTiL. The solid was dissolved again in 10 mL of CH2Cl2 and stripped to dryness on a rotary evaporator. The dissolution and solvent evaporation were repeated another four times. The yellow solid was then dissolved in a minimum amount of CH2Cl2 (about 5 mL) and 20 mL of CH3CN were layered on top of the solution. After standing for a week, yellow crystals of LTiOTiLwere collected by suction filtration on a fritted glass funnel, washed with 3  10 mL CH3CN and then air-dried. Yield: 0.1068 g (79%). 1H NMR (C6D6):  7.48 (d, 2 Hz, 3H, Ar*H*), 6.86 (d, 2 Hz, 3H, Ar*H*), 4.37 (d, 14 Hz, 3H, C*H*H'), 2.79 (d, 14 Hz, 3H, CH*H'*), 1.61 (s, 27H, *t*Bu), 1.32 (s, 27H, *t*Bu). 13C{1H} NMR (C6D6):  161.32, 142.94, 136.32, 125.43, 124.52, 124.16, 59.29, 36.10, 34.81, 32.21, 32.03. IR: 2925 (s), 1623 (m), 1390 (m), 1290 (w), 1079 (w), 1029 (w). Anal. Calcd. for C90H132N2O7Ti2: C, 74.56; H, 9.18; N, 1.93. Found: C, 74.38; H, 8.98; N, 1.90.

1. M. Kol, M. Shamis, I. Goldberg, Z. Goldschmidt, S. Alfi and E. Hayut-Salant, *Inorg. Chem. Commun.* 2001, **4**, 177-179. [↑](#footnote-ref-2)
